# Supplementary material
Source: publisher figshare collection journal article supplement (https://tandf.figshare.com/ndownloader/files/22282698)
Supplement: Supplementary file 1 [file 22282698]

TITLE: Thrombopoietin receptor agonists for the treatment of primary immune thrombocytopenia: a meta-analysis and systematic review.

thrombocytopenia: a meta-analysis and systematic review.

Simone Birocchi1, Gian Marco Podda1, Marco Manzoni1, Giovanni Casazza2, Marco Cattaneo1

1Unità di Medicina II, ASST Santi Paolo e Carlo - Dipartimento di Scienze della Salute, Università degli Studi di Milano; 2Dipartimento di Scienze Biomediche e Cliniche "L. Sacco", Università degli Studi di Milano. Milano, Italy.

Online Supplement

Table: WITHDRAWALS IN RCT AND COHORT STUDIES

| **RCT** | **TOT** | **WITHDRAWAL FROM THERAPY** | **WITHDRAWAL FROM STUDY** |
| --- | --- | --- | --- |
| **Bussel 2006 Phase 2** | 17 | 1 | 0 |
| **Bussel 2007** | 30 | 13 | 3 |
| **Bussel 2011** | 17 | 0 | 0 |
| **Bussel 2014** | 59 | 0 | 0 |
| **Bussel 2015 RCT** | 45 | 2 | 0 |
| **Cheng 2011** | 135 | 23 | 4 |
| **Elalfy 2011** | 12 | 0 | 0 |
| **Grainger 2015** | 63 | 2 | 0 |
| **Jurczak 2018** | 32 | 10 | 0 |
| **Kuter 2008** | 83 | 3 | 1 |
| **Shirasugi 2011** | 22 | 0 | 0 |
| **Tarantino 2016** | 42 | 1 | 0 |
| **Tomiyama 2012** | 15 | 0 | 0 |
| **Yang 2017** | 104 | 4 | 0 |
| **TOT** | 676 | 59 | 8 |

| **COHORT STUDIES** | **TOT** | **WITHDRAWAL FROM THERAPY** | **WITHDRAWAL FROM STUDY** |
| --- | --- | --- | --- |
| **Bussel 2006 Phase 1** | 24 | 0 | 0 |
| **Bussel 2009** | 142 | 31 | 17 |
| **Bussel 2013** | 66 | 18 | 0 |
| **Bussel 2014 extend** | 53 | 18 | 0 |
| **bussel 2015 cohort** | 22 | 7 | 0 |
| **Katsutani 2013** | 19 | 4 | 0 |
| **Kim 2015** | 18 | 13 | 0 |
| **Kuter 2013** | 291 | 76 | 50 |
| **Newland 2006** | 16 | 2 | 0 |
| **Newland 2016** | 75 | 16 | 10 |
| **Shirasugi 2012** | 44 | 5 | 0 |
| **Steurer 2017** | 340 | 133 | 14 |
| **Tripathi 2014** | 25 | 2 | 2 |
| **Wong 2017** | 302 | 167 | 93 |
| **TOT** | 1437 | 492 | 186 |

We considered a “withdrawal from study” when a patient follow-up was terminated without the occurrence of an adverse effect or a predefined outcome. Examples are lost to follow-up, decision to withdraw informed consent, unexplained reason).
